# Supplementary material for: Integrated structural, vibrational, thermal, and optical characterization of a zinc-based organic–inorganic hybrid with DFT and molecular docking insights into its biological properties
Source: Royal Society of Chemistry journal article supplement (doi:10.1039/d6ra03131e), 2026-05-12
Supplement: d6ra03131e1.pdf [file d6ra03131e1.pdf]

## Supplementary data

### **Integrated Structural, Vibrational, Thermal, and Optical Characterization of a Zinc-Based Organic–Inorganic Hybrid with DFT and Molecular Docking Insights into Its Biological Properties**

Houyem Khelifi<sup>a</sup>, Mashael A. Alghamdi<sup>b</sup>, Intissar Tababi<sup>a</sup>, Hayet Edziri<sup>c</sup>, Marwa Melliti<sup>c</sup>,  
Ahlem Guesmi<sup>b</sup>, Hossam H. Nasrallah<sup>d</sup>, Nouredine Mhadhbi<sup>a,e</sup>, Naoufel Ben Hamadi<sup>b</sup> and  
Houcine Naïli<sup>\*a</sup>

*<sup>a</sup>Laboratory Physical-Chemistry of the Solid State, Department of Chemistry, Faculty of  
Sciences of Sfax, B.P. 1171, Sfax 3000, University of Sfax, Tunisia.*

<sup>b</sup>Chemistry Department, College of Science, Imam Mohammad Ibn Saud Islamic University (IMSIU),  
Riyadh 11623, Saudi Arabia.

*<sup>c</sup>Laboratory of Transmissible Diseases and Biologically Active Substances (LR99ES27),  
Faculty of Pharmacy, University of Monastir, Monastir, Tunisia.*

*<sup>d</sup>Chemistry Department, Faculty of Biotechnology, Sinai University, Kantara 41632, Egypt.*

*<sup>e</sup>University of Monastir, Preparatory Institute for Engineering Studies of Monastir, Monastir  
5019, Tunisia.*

*\* Corresponding author e-mail address: [houcine\\_naili@yahoo.com](mailto:houcine_naili@yahoo.com)*

**Table S1.** Experimental conditions and data collection of the  $(\text{C}_9\text{H}_8\text{N})_2[\text{ZnCl}_4]\cdot 2\text{H}_2\text{O}$  crystal.

|                                                                             |                                                                            |
|-----------------------------------------------------------------------------|----------------------------------------------------------------------------|
| Formula                                                                     | $(\text{C}_9\text{H}_8\text{N})_2[\text{ZnCl}_4]\cdot 2\text{H}_2\text{O}$ |
| Color/Shape                                                                 | Plate, colorless                                                           |
| M ( $\text{g mol}^{-1}$ )                                                   | 503.53                                                                     |
| Crystal system                                                              | Monoclinic                                                                 |
| Space group                                                                 | $C2/c$                                                                     |
| Density                                                                     | 1.602                                                                      |
| Crystal size (mm)                                                           | $0.18 \times 0.13 \times 0.04$                                             |
| Temperature (K)                                                             | 100                                                                        |
| Diffractometer                                                              | Xcalibur. Atlas. Gemini ultra                                              |
| $a, b, c$ ( $\text{\AA}$ )                                                  | 11.7276 (3), 9.8806 (2), 18.3798 (4)                                       |
| $\beta$ ( $^\circ$ )                                                        | 101.355 (2)                                                                |
| Unit-cell volume ( $\text{\AA}^3$ )                                         | 2088.08 (8)                                                                |
| Z                                                                           | 4                                                                          |
| Radiation type                                                              | Mo $K\alpha$ (0.71073 $\text{\AA}$ )                                       |
| Absorption correction                                                       | Multi-scan                                                                 |
| $\theta$ ( $^\circ$ )                                                       | $2.7 \leq \theta \leq 30.7$                                                |
| No. of measured, independent, and observed [ $I > 2\sigma(I)$ ] reflections | 23309, 2856, 2570                                                          |
| Index ranges                                                                | $h = -16/16. k = -14/13. l = -26/25$                                       |
| $(\Delta/\sigma)_{\text{max}}$                                              | = 0.001                                                                    |
| $R[F^2 > 2\sigma(F^2)], wR(F^2), S$                                         | 0.021, 0.051, 1.06                                                         |
| F(000)                                                                      | 1024                                                                       |
| $\Delta\rho_{\text{max}}/\Delta\rho_{\text{min}}$ ( $\text{e \AA}^{-3}$ )   | 0.35 / -0.26                                                               |

**Table S2.** Fractional atomic coordinates and isotropic or equivalent isotropic displacement parameters ( $\text{\AA}^2$ ).

|            | <b>x</b>     | <b>y</b>     | <b>z</b>    | <b>Uiso*/Ueq</b> |
|------------|--------------|--------------|-------------|------------------|
| <b>Zn1</b> | 0.500000     | 0.84465 (2)  | 0.750000    | 0.01398 (6)      |
| <b>Cl1</b> | 0.65065 (3)  | 0.71237 (3)  | 0.80803 (2) | 0.02032 (7)      |
| <b>Cl2</b> | 0.57264 (3)  | 0.97068 (3)  | 0.66770 (2) | 0.02047 (7)      |
| <b>O1</b>  | 0.34922 (8)  | 0.39959 (10) | 0.72508 (5) | 0.02215 (19)     |
| <b>H1B</b> | 0.276731     | 0.380104     | 0.724628    | 0.033*           |
| <b>H1C</b> | 0.351339     | 0.487625     | 0.724835    | 0.033*           |
| <b>N1</b>  | 0.43774 (9)  | 0.34680 (10) | 0.60066 (6) | 0.0169 (2)       |
| <b>H1</b>  | 0.408831     | 0.363809     | 0.640410    | 0.020*           |
| <b>C1</b>  | 0.54303 (11) | 0.29337 (13) | 0.60954 (7) | 0.0187 (2)       |
| <b>H1A</b> | 0.585369     | 0.274596     | 0.658082    | 0.022*           |
| <b>C2</b>  | 0.59248 (11) | 0.26433 (13) | 0.54800 (7) | 0.0196 (2)       |
| <b>H2</b>  | 0.668189     | 0.226242     | 0.554504    | 0.023*           |
| <b>C3</b>  | 0.53060 (11) | 0.29139 (12) | 0.47834 (7) | 0.0176 (2)       |
| <b>H3</b>  | 0.563433     | 0.271471     | 0.436260    | 0.021*           |
| <b>C4</b>  | 0.41800 (11) | 0.34884 (12) | 0.46847 (7) | 0.0150 (2)       |
| <b>C5</b>  | 0.34896 (12) | 0.37795 (13) | 0.39785 (7) | 0.0184 (2)       |
| <b>H5</b>  | 0.378340     | 0.359975     | 0.354208    | 0.022*           |
| <b>C6</b>  | 0.24009 (12) | 0.43189 (13) | 0.39234 (7) | 0.0206 (3)       |
| <b>H6</b>  | 0.194272     | 0.450920     | 0.344808    | 0.025*           |
| <b>C7</b>  | 0.19524 (11) | 0.45950 (13) | 0.45670 (8) | 0.0204 (3)       |
| <b>H7</b>  | 0.119544     | 0.497043     | 0.451867    | 0.025*           |
| <b>C8</b>  | 0.25926 (11) | 0.43297 (13) | 0.52601 (7) | 0.0180 (2)       |
| <b>H8</b>  | 0.228698     | 0.451939     | 0.569100    | 0.022*           |
| <b>C9</b>  | 0.37128 (10) | 0.37703 (12) | 0.53214 (7) | 0.0149 (2)       |

**Table S3.** Geometric parameters (Å, °).

| <b>Distances</b> |              |
|------------------|--------------|
| Zn1—Cl1i         | 2.2859 (3)   |
| Zn1—Cl1          | 2.2858 (3)   |
| Zn1—Cl2          | 2.2521 (3)   |
| Zn1—Cl2i         | 2.2520 (3)   |
| O1—H1B           | 0.8701       |
| O1—H1C           | 0.8702       |
| N1—H1            | 0.8800       |
| N1—C1            | 1.3231 (17)  |
| N1—C9            | 1.3771 (16)  |
| C1—H1A           | 0.9500       |
| C1—C2            | 1.3986 (18)  |
| C2—H2            | 0.9500       |
| C2—C3            | 1.3681 (18)  |
| C3—H3            | 0.9500       |
| C3—C4            | 1.4158 (17)  |
| C4—C5            | 1.4174 (17)  |
| C4—C9            | 1.4141 (16)  |
| C5—H5            | 0.9500       |
| C5—C6            | 1.3688 (19)  |
| C6—H6            | 0.9500       |
| C6—C7            | 1.4125 (19)  |
| C7—H7            | 0.9500       |
| C7—C8            | 1.3707 (18)  |
| C8—H8            | 0.9500       |
| C8—C9            | 1.4093 (17)  |
| <b>Angles</b>    |              |
| Cl1—Zn1—Cl1i     | 110.252 (19) |
| Cl2—Zn1—Cl1i     | 111.258 (11) |
| Cl2i—Zn1—Cl1     | 111.260 (11) |
| Cl2—Zn1—Cl1      | 105.647 (11) |

|                      |              |
|----------------------|--------------|
| <b>Cl2i—Zn1—Cl1i</b> | 105.647 (11) |
| <b>Cl2i—Zn1—Cl2</b>  | 112.863 (19) |
| <b>H1B—O1—H1C</b>    | 104.5        |
| <b>C1—N1—H1</b>      | 118.5        |
| <b>C1—N1—C9</b>      | 123.07 (11)  |
| <b>C9—N1—H1</b>      | 118.5        |
| <b>N1—C1—H1A</b>     | 119.7        |
| <b>N1—C1—C2</b>      | 120.50 (11)  |
| <b>C2—C1—H1A</b>     | 119.7        |
| <b>C1—C2—H2</b>      | 120.4        |
| <b>C3—C2—C1</b>      | 119.26 (12)  |
| <b>C3—C2—H2</b>      | 120.4        |
| <b>C2—C3—H3</b>      | 119.7        |
| <b>C2—C3—C4</b>      | 120.52 (11)  |
| <b>C4—C3—H3</b>      | 119.7        |
| <b>N1—C1—C2—C3</b>   | -0.20 (19)   |
| <b>C1—N1—C9—C4</b>   | 0.30 (18)    |
| <b>C1—N1—C9—C8</b>   | 179.54 (11)  |
| <b>C1—C2—C3—C4</b>   | 0.35 (19)    |
| <b>C2—C3—C4—C5</b>   | -179.31 (12) |
| <b>C2—C3—C4—C9</b>   | -0.18 (18)   |
| <b>C3—C4—C5—C6</b>   | 179.12 (12)  |
| <b>C3—C4—C9—N1</b>   | -0.14 (17)   |
| <b>C3—C4—C9—C8</b>   | -179.37 (11) |
| <b>Cl1—Zn1—Cl1i</b>  | 110.252 (19) |
| <b>Cl2—Zn1—Cl1i</b>  | 111.258 (11) |
| <b>Cl2i—Zn1—Cl1</b>  | 111.260 (11) |
| <b>Cl2—Zn1—Cl1</b>   | 105.647 (11) |
| <b>Cl2i—Zn1—Cl1i</b> | 105.647 (11) |
| <b>Cl2i—Zn1—Cl2</b>  | 112.863 (19) |
| <b>H1B—O1—H1C</b>    | 104.5        |
| <b>C1—N1—H1</b>      | 118.5        |
| <b>C1—N1—C9</b>      | 123.07 (11)  |

|             |              |
|-------------|--------------|
| C9—N1—H1    | 118.5        |
| N1—C1—H1A   | 119.7        |
| N1—C1—C2    | 120.50 (11)  |
| C2—C1—H1A   | 119.7        |
| C1—C2—H2    | 120.4        |
| C3—C2—C1    | 119.26 (12)  |
| C3—C2—H2    | 120.4        |
| C2—C3—H3    | 119.7        |
| C2—C3—C4    | 120.52 (11)  |
| C4—C3—H3    | 119.7        |
| N1—C1—C2—C3 | -0.20 (19)   |
| C1—N1—C9—C4 | 0.30 (18)    |
| C1—N1—C9—C8 | 179.54 (11)  |
| C1—C2—C3—C4 | 0.35 (19)    |
| C2—C3—C4—C5 | -179.31 (12) |
| C2—C3—C4—C9 | -0.18 (18)   |
| C3—C4—C5—C6 | 179.12 (12)  |
| C3—C4—C9—N1 | -0.14 (17)   |
| C3—C4—C9—C8 | -179.37 (11) |

Symmetry code: (i)  $-x+1, y, -z+3/2$ .

**Table S4.** Hydrogen bonds in  $(C_9H_8N)_2[ZnCl_4] \cdot 2H_2O$ .

| D—H $\cdots$ A                                                         | D—H (Å) | H $\cdots$ A (Å) | D $\cdots$ A (Å) | D—H $\cdots$ A (°) |
|------------------------------------------------------------------------|---------|------------------|------------------|--------------------|
| O <sub>1</sub> —H <sub>1B</sub> $\cdots$ Cl <sub>2</sub> <sup>ii</sup> | 0.87    | 2.58             | 3.283            | 139                |
| O <sub>1</sub> —H <sub>1C</sub> $\cdots$ Cl <sub>1</sub> <sup>i</sup>  | 0.87    | 2.30             | 3.1498 (11)      | 165                |
| N <sub>1</sub> —H <sub>1</sub> $\cdots$ O <sub>1</sub>                 | 0.88    | 1.86             | 2.7412 (14)      | 179                |

Symmetry codes : (i)  $-x+1, y, -z+3/2$ ; (ii)  $x-1/2, y-1/2, z$ .

**Table S5.** Geometric parameters of  $\pi$ - $\pi$  and C—H $\cdots$  $\pi$  interactions

| Interaction                | Centroid–centroid distance<br>(Å) | Interplanar distance<br>(Å) | Slippage angle<br>(°) |
|----------------------------|-----------------------------------|-----------------------------|-----------------------|
| $\pi$ – $\pi$<br>(Cg···Cg) | 3.698                             | 3.365                       | 1.05                  |
| $\pi$ – $\pi$<br>(Cg···Cg) | 3.690                             | 3.478                       | 2.28                  |
| C–H··· $\pi$               | 3.370                             | 3.365                       | 1.07                  |

**Table S6.** IR and Raman frequencies ( $\text{cm}^{-1}$ ) and band assignments for  $(\text{C}_9\text{H}_8\text{N})_2[\text{ZnCl}_4]\cdot 2\text{H}_2\text{O}$ .

| IR   | Raman | Assignments                          |
|------|-------|--------------------------------------|
| 3485 | -     | $\nu(\text{O–H})$                    |
| 3394 | -     | $\nu_{\text{as}}(\text{C–H})$        |
| -    | 3195  | $\nu(\text{N–H})$                    |
| 3087 | -     | $\nu(\text{C=N})$                    |
| 3038 | 3060  | $\nu(\text{C=C})$                    |
| 2667 | -     | $\delta(\text{C–H})$                 |
| -    | 2470  | $\nu(\text{C–N})$                    |
| 2130 | 2149  | $\nu_{\text{in-plane}}(\text{Ring})$ |
| 2004 | 1978  | $\rho(\text{C–H})$                   |
| 1648 | -     | $\nu(\text{Pd–O})$                   |
| -    | 1878  | $\nu(\text{Pd–Cl})$                  |
| 1600 | 1600  | $\delta(\text{Framework})$           |
| 1488 | 1491  | $\delta(\text{Pd–Cl})$               |
| 1383 | 1382  | $\nu_{\text{as}}(\text{Pd–Cl})$      |
| 1313 | -     | $\beta(\text{Pd–O–Cl})$              |
| -    | 1057  | $\tau(\text{Framework})$             |
| 1215 | -     | $\beta(\text{Lattice})$              |
| 1062 | -     | $\beta(\text{Lattice})$              |
| 949  | -     | $\tau(\text{Framework})$             |
| 810  | -     | $\beta(\text{Lattice})$              |
| 761  | 772   | $\delta(\text{Pd–Cl})$               |
| 608  | -     | $\tau(\text{Framework})$             |
| 517  | 521   | $\nu_{\text{as}}(\text{Pd–Cl})$      |
| 454  | -     | $\tau(\text{Framework})$             |
| -    | 104   | $\nu_s(\text{Pd–Cl})$                |
| -    | 75    | $\beta(\text{Lattice})$              |
| -    | 52    | $\beta(\text{Lattice})$              |

$\nu$ : stretching,  $\nu_{\text{as}}$ : asymmetric stretching,  $\beta$ : in plane bending,  $\delta$ : scissoring,  $\tau$ : twisting,  $\rho$ : rocking

**Table S7.** Quantum Chemical Parameters of Zn Complex of zinc complex.

| Parameter                             | Zn Complex |
|---------------------------------------|------------|
| HOMO (eV)                             | -12.32     |
| LUMO (eV)                             | -7.48      |
| Energy Gap, Eg (eV)                   | 4.84       |
| Optical Band Gap (eV)                 | 4.84       |
| Dipole Moment (D)                     | 10.45      |
| SCF Energy (eV)                       | -4801.86   |
| Chemical Potential, $\mu$ (eV)        | -9.90      |
| Electronegativity, $\chi$ (eV)        | 9.90       |
| Chemical Hardness, $\eta$ (eV)        | 2.42       |
| Softness, S (eV <sup>-1</sup> )       | 0.207      |
| Electrophilicity Index, $\omega$ (eV) | 20.25      |

**Table S8.** Predicted Physicochemical and ADME Properties of Ciprofloxacin and zinc complex.

| Parameter Category      | Property                 | Ciprofloxacin         | Zinc Complex           |
|-------------------------|--------------------------|-----------------------|------------------------|
| <b>Physicochemical</b>  | Molecular Weight (g/mol) | 331.34                | 503.56                 |
|                         | TPSA (Å <sup>2</sup> )   | 74.57                 | 46.74                  |
| <b>Lipophilicity</b>    | Consensus Log P          | 1.10                  | 3.46                   |
| <b>Water Solubility</b> | Ali Log S (Class)        | 0.00 (Highly Soluble) | -7.26 (Poorly Soluble) |
| <b>Pharmacokinetics</b> | GI Absorption            | High                  | High                   |
|                         | BBB Permeant             | No                    | No                     |
|                         | P-gp Substrate           | Yes                   | Yes                    |
| <b>Drug-likeness</b>    | Lipinski Violations      | 0                     | 1 (MW > 500)           |
|                         | Veber Violations         | 0                     | 0                      |
|                         | Bioavailability Score    | 0.55                  | 0.55                   |
| <b>Synthesis</b>        | Synthetic Accessibility  | 2.51                  | 2.23                   |

**Table S9.** Absorption Properties (pkCSM Prediction) for Zn Complex.

| Property Category | Model Name                                              | Predicted Value |
|-------------------|---------------------------------------------------------|-----------------|
| <b>Absorption</b> | Water Solubility (log mol/L)                            | -3.774          |
|                   | Caco-2 Permeability (log Papp in 10 <sup>-6</sup> cm/s) | 0.623           |
|                   | Intestinal Absorption (Human, %)                        | 91.607          |
|                   | Skin Permeability (log Kp)                              | -2.704          |
|                   | P-glycoprotein (P-gp) Substrate                         | No              |
|                   | P-gp I Inhibitor                                        | Yes             |
|                   | P-gp II Inhibitor                                       | Yes             |

**Table S10.** Molecular Docking of Ciprofloxacin and Zn complex with DNA Gyrase (PDB: 1AB4).

| Ligand        | Ligand Sites | Receptor Sites | Type of Interaction  | Distance (Å) | Binding Energy (kcal/mol) | Total Binding Energy (kcal/mol) |
|---------------|--------------|----------------|----------------------|--------------|---------------------------|---------------------------------|
| Ciprofloxacin | N29          | ASP87 (A)      | H-bond (donor)       | 2.96         | -0.9                      | -6.13                           |
|               | O41          | VAL268 (A)     | H-bond (donor)       | 2.75         | -2.3                      |                                 |
| Zn complex    | 6-ring       | PHE96 (A)      | $\pi$ -H interaction | 4.15         | -0.6                      | -4.96                           |
|               | 6-ring       | GLN267 (A)     | $\pi$ -H interaction | 4.12         | -0.6                      |                                 |

**Table S11.** Molecular Docking of Ciprofloxacin and Zn complex with LasR (PDB: 3IX3).

| <b>Ligand</b> | <b>Ligand Sites</b> | <b>Receptor Sites</b> | <b>Type of Interaction</b> | <b>Distance (Å)</b> | <b>Binding Energy (kcal mol<sup>-1</sup>)</b> | <b>Total Binding Energy (kcal mol<sup>-1</sup>)</b> |
|---------------|---------------------|-----------------------|----------------------------|---------------------|-----------------------------------------------|-----------------------------------------------------|
| Ciprofloxacin | O1                  | TRP60 (A)             | H-acceptor                 | 3.29                | -1.7                                          | -7.68                                               |
| Zn complex    | CL5                 | TYR47 (A)             | H-donor                    | 3.15                | -2.4                                          | -5.88                                               |
|               | 6-ring              | TYR64 (A)             | $\pi$ - $\pi$ stacking     | 3.60                | ~0.0                                          |                                                     |
